# Supplementary material
Source: publisher figshare collection journal article supplement (https://gsajournals.figshare.com/ndownloader/files/18009617)
Supplement: Supplementary file 1 [file 18009617]

## Sheet: Sheet1
Table S7. The summary of the QTL detected for reproductive maturity in IBM x Oy1-N1989/+:B73 F1 test cross populations.
						LOD-2 Intervale			Mean±SEg
Trait Identifier	Chrb	LODc	Positiond	Left Marker	Right Marker	Left	Right	PVEf	B73	Mo17	Greater Allele
MT_DTA	10	29.7	144	phi059	isu85b	124	146.8	46.92	69.58±0.27	75.31±0.33	Mo17
MT_DTS	10	33.8	127	umc2034	AI795367	124	131	39.5	69.97±0.29	74.70±0.39	Mo17
Ratio_DTA	10	32.9	139	AI795367	AY109994	128	146	47.04	1.11±0.01	1.21±0.01	Mo17
Ratio_DTS	10	32.1	139	AI795367	AY109994	125	146	46.6	1.08±0.01	1.17±0.01	Mo17
Diff_DTA	10	34.6	139	AI795367	AY109994	127	146	48.39	-7.01±0.28	-12.88±0.35	B73
Diff_DTS	10	34	129	umc2034	AI795367	124	146	45.76	-5.87±0.27	-11.36±0.37	B73
aNumber of QTL detected for a given trait
bChromosome location of a QTL
cLOD score at the peak of a given QTL
dPeak position and eLOD-2 interval of the QTL in terms of genetic position in centiMorgan(cM)
fPVE is percent of variance explained by the QTL at this position as estimated by regression and reported as an R2 value*100
gMean and standard error of the trait with B73 and Mo17 genotype at the peak marker of the detected QTL
